# Supplementary material
Source: PubMed Central journal article supplement (PMC2579959)
Supplement: NIHMS75478-supplement-supplement_1.pdf [file NIHMS75478-supplement-supplement_1.pdf]

## SUPPLEMENTAL FIGURE LEGEND

**Fig. 1.** Risk ratio (RR) of CHD for participants with various combinations of sTM and fibrinogen tertiles vs. upper tertile sTM/lower tertile fibrinogen as the reference group. Besides adjusting for age, sex, race, and cardiovascular risk factors, adjustment was made for BMI. *p* values refer to comparison with the reference group.

**Fig. 2.** Risk ratio (RR) of CHD for participants with various combinations of sTM and fibrinogen tertiles vs. upper tertile sTM/lower tertile fibrinogen as the reference group. Besides adjusting for age, sex, race, and cardiovascular risk factors, adjustment was made for CRP. *p* values refer to comparison with the reference group.

**\* Statement of Originality**

This piece of the submission is being sent via mail.

**Supplementary Material**

[Click here to download Supplementary Material: Supplemtal\\_Fig1\\_sTM vs Fib adj by BMI\\_0502\\_2007.ppt](#)

**Supplementary Material**

[Click here to download Supplementary Material: Supplemtal\\_Fig2\\_sTM vs Fib adj by CRP\\_0502\\_2007.ppt](#)
